# Supplementary material
Source: PubMed Central journal article supplement (PMC8390950)
Supplement: NIHMS1716483-supplement-11.pdf [file NIHMS1716483-supplement-11.pdf]

**Table S1, related to Figure 6 and Figure S5** Range of parameter values used for the MAPPA framework

| <b>Name</b>                         | <b>Name in the main text</b>                  | <b>min</b> | <b>max</b> |
|-------------------------------------|-----------------------------------------------|------------|------------|
| $\nu$                               | TCR <sup>off-rate</sup>                       | 0.2        | 0.4        |
| $K_{TCR \rightarrow IL2R\alpha}$    | TCR_EC50 <sup>IL-2R<math>\alpha</math></sup>  | 0.1        | 1          |
| $K_{costim \rightarrow IL2R\alpha}$ | CD28_EC50 <sup>IL-2R<math>\alpha</math></sup> | 10         | 100        |
| $K_{JAK \rightarrow pSTAT5}$        | JAK_EC50 <sup>pSTAT5</sup>                    | 0.01       | 0.1        |
| $K_{TCR \rightarrow IL2}$           | TCR_EC50 <sup>IL-2</sup>                      | 0.1        | 1          |
| $K_{costim \rightarrow IL2}$        | CD28_EC50 <sup>IL-2</sup>                     | 10         | 100        |
| $K_{pSTAT5 \rightarrow IL2}$        | pSTAT5_EC50 <sup>IL-2</sup>                   | 0.1        | 1          |
| $D_{IL2}$                           | IL-2 <sup>D</sup>                             | 10         | 100        |
| $n_{tr}$                            | Treg <sup><math>\lambda</math></sup>          | 0.0001     | 0.001      |
| $f_{cont\_low}$                     | Treg <sup>Contact_baseline</sup>              | 0.1        | 0.4        |
| $f_{cont\_high}$                    | Treg <sup>Contact_stimulated</sup>            | 1          | 2.5        |
| $L_{antigen}$                       | [Antigen]                                     | 100        | 1,000      |
| $L_{CD80 CD86}$                     | [CD80/86]                                     | 100,000    | 1000,000   |
